# Supplementary material
Source: publisher site journal article supplement (https://www.dovepress.com/article/450229)
Supplement: Supplementary file 1 [file get_supplementary_file.php]

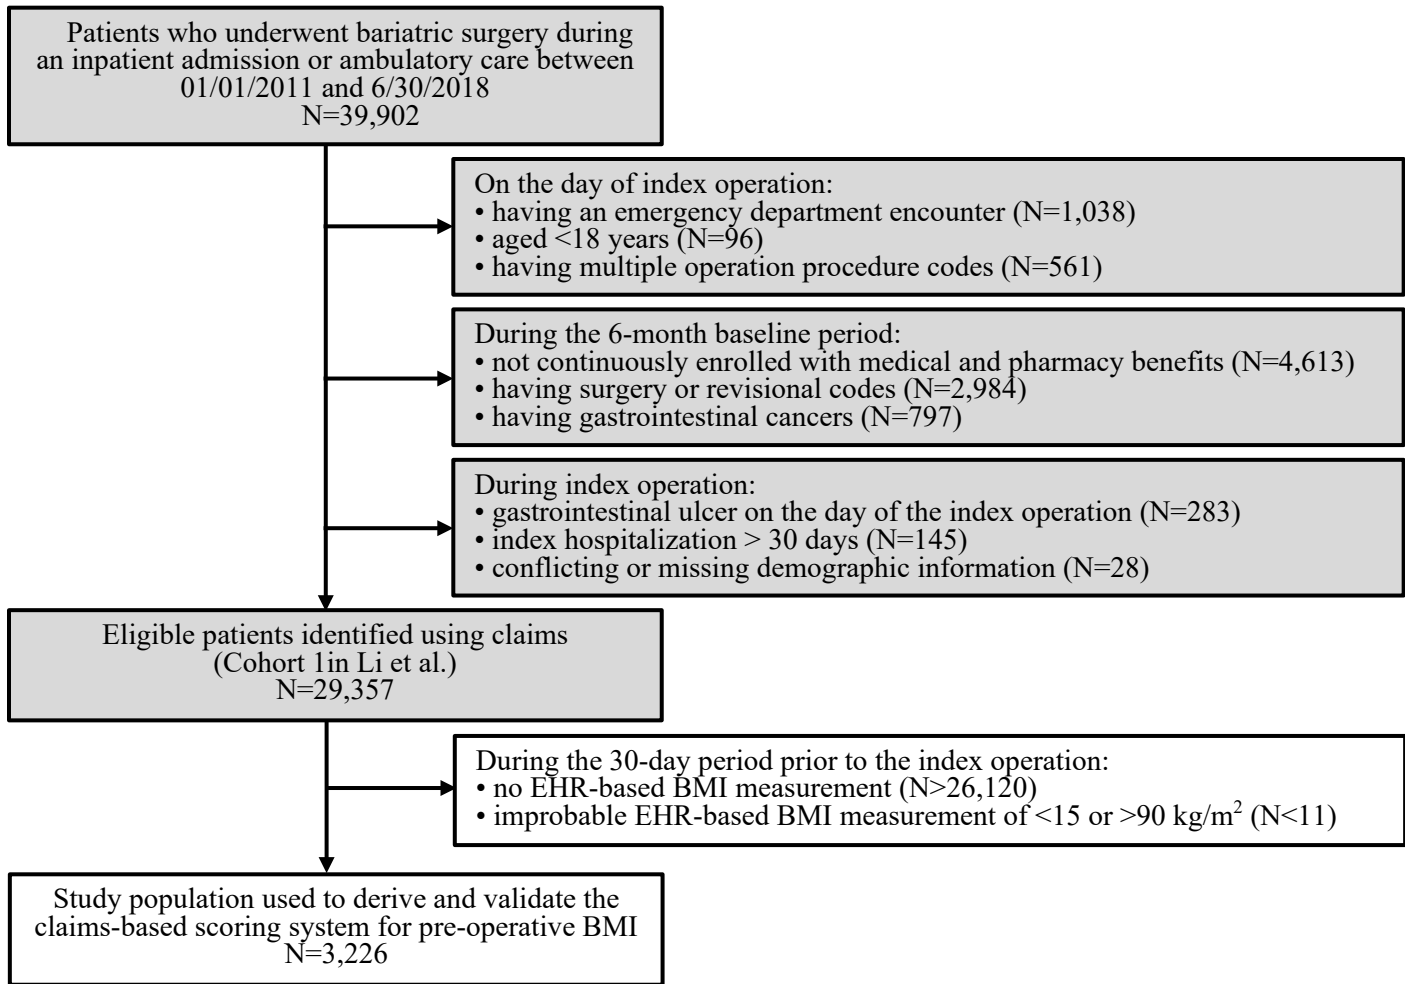

**eFigure. Inclusion and exclusion criteria used to identify the study population**

We replicated the inclusion and exclusion criteria for *Cohort 1* in Li *et al.*,<sup>1</sup> which was used to evaluate the availability of weight-related diagnosis codes during the preoperative and postoperative periods in a retrospective cohort of bariatric surgery patients (grey colored boxes). From among the eligible patients in *Cohort 1*, we identified the subset of bariatric surgery patients with a BMI measurement recorded in their linked EHR data on or within 30 days prior to the day of the index procedure, where BMI values <15 or >90 kg/m<sup>2</sup> were excluded to avoid including probable data entry errors (white colored boxes). This subset of bariatric surgery patients comprised the final study population that we used to derive and validate the claims-based scoring system for pre-operative BMI. Note that exclusion criteria with <11 individuals have been masked to maintain the deidentification nature of the database.

Reference:

<sup>1</sup>Li, X., Lewis, K.H., Callaway, K. et al. Suitability of administrative claims databases for bariatric surgery research – is the glass half-full or half-empty?. *BMC Med Res Methodol* 20, 225 (2020).

**eTable 1. Code mappings for weight-related diagnosis codes into weight categories**

| <b>Weight Category<sup>a</sup></b>        | <b>ICD-9-CM Codes</b>                                                   | <b>ICD-10-CM Codes</b>                                                                            |
|-------------------------------------------|-------------------------------------------------------------------------|---------------------------------------------------------------------------------------------------|
| Underweight, normal weight, or overweight | 78322,<br>V850,<br>V851,<br>V8521, V8522, V8523, V8524, V8525,<br>27802 | R636,<br>Z681<br>Z6820, Z6821, Z6822, Z6823, Z6824,<br>Z6825, Z6826, Z6827, Z6828, Z6829,<br>E663 |
| BMI 30.0-34.9                             | V8530, V8531, V8532, V8533, V8534                                       | Z6830, Z6831, Z6832, Z6833, Z6834                                                                 |
| BMI 35.0-35.9                             | V8535                                                                   | Z6835                                                                                             |
| BMI 36.0-36.9                             | V8536                                                                   | Z6836                                                                                             |
| BMI 37.0-37.9                             | V8537                                                                   | Z6837                                                                                             |
| BMI 38.0-38.9                             | V8538                                                                   | Z6838                                                                                             |
| BMI 39.0-39.9                             | V8539                                                                   | Z6839                                                                                             |
| BMI 40.0-44.9                             | V8541                                                                   | Z6841                                                                                             |
| BMI 45.0-49.9                             | V8542                                                                   | Z6842                                                                                             |
| BMI 50.0-59.9                             | V8543                                                                   | Z6843                                                                                             |
| BMI 60.0-69.9                             | V8544                                                                   | Z6844                                                                                             |
| BMI ≥70.0                                 | V8545                                                                   | Z6845                                                                                             |
| Obese, nonspecific                        | 27800,<br>27803                                                         | E669,<br>E6609,<br>E661,<br>E668                                                                  |
| Severely obese, nonspecific               | 27801                                                                   | E6601,<br>E662                                                                                    |

Abbreviations: BMI = body mass index; ICD-9-CM = International Classification of Diseases, Ninth Revision, Clinical Modification; ICD-10-CM = International Classification of Diseases, Tenth Revision, Clinical Modification

<sup>a</sup>Each weight category was a unique candidate predictor in the claims-based models and scoring system, where weight categories were not mutually exclusive (to capture patients who had ICD codes for multiple weight categories documented in the pre-operative period).

**eTable 2. Tuning parameters for the random forest and LASSO regression models**

| <b>Algorithm</b> | <b>Tuning Parameter</b> | <b>Description</b>                                                              | <b>Subset of values considered<sup>a</sup></b>                           | <b>Tuned value<sup>b</sup></b> |
|------------------|-------------------------|---------------------------------------------------------------------------------|--------------------------------------------------------------------------|--------------------------------|
| Random forest    | nTree                   | Number of trees                                                                 | {50, 100, 250, 500, 1000, 1500, 2000}                                    | 1000                           |
|                  | mTry                    | Number of candidate features considered at each node                            | {5, 10, 15, 30, 60}                                                      | 15                             |
| LASSO            | lambda                  | Controls amount of regularization (shrinkage) applied to the model coefficients | Sequence of 100 values automatically selected by the glmnet package in R | 0.0283                         |

Abbreviations: LASSO = least absolute shrinkage and selection operator

<sup>a</sup>A 10-fold cross-validation procedure in the training set was used to evaluate the (cross-validated) performance of each algorithm across the subset of values for the tuning parameter. For the random forest, a grid of all possible combinations for the tuning parameter values were evaluated (7 values for nTree X 5 values for mTry = 35 combinations).

<sup>b</sup>The tuned values were used in the final fitted models and represent the value (or set of values for the random forest) that yielded the algorithm with the lowest cross-validated mean squared error in the training set.

**eTable 3. Full set of comorbidities considered for prediction models**

| <b>Comorbidity n (%)</b>          | <b>Overall<br/>(N=3,226)</b> | <b>Training Set,<br/>2011-2017<br/>(N=2,704)<sup>a</sup></b> | <b>Concurrent Testing Set,<br/>2011-2017<br/>(N=301)<sup>a</sup></b> | <b>Prospective Testing Set,<br/>2018<br/>(N=221)<sup>a</sup></b> |
|-----------------------------------|------------------------------|--------------------------------------------------------------|----------------------------------------------------------------------|------------------------------------------------------------------|
| Hypertension                      | 2236 (69.3)                  | 1871 (69.2)                                                  | 219 (72.8)                                                           | 146 (66.1)                                                       |
| Gastroesophageal reflux disease   | 1942 (60.2)                  | 1614 (59.7)                                                  | 191 (63.5)                                                           | 137 (62.0)                                                       |
| Sleep apnea                       | 1826 (56.6)                  | 1516 (56.1)                                                  | 181 (60.1)                                                           | 129 (58.4)                                                       |
| Dyslipidemia                      | 1825 (56.6)                  | 1534 (56.7)                                                  | 169 (56.2)                                                           | 122 (55.2)                                                       |
| Diabetes                          | 1159 (35.9)                  | 952 (35.2)                                                   | 118 (39.2)                                                           | 89 (40.3)                                                        |
| Depression                        | 1115 (34.6)                  | 926 (34.3)                                                   | 112 (37.2)                                                           | 77 (34.8)                                                        |
| Anxiety                           | 1080 (33.5)                  | 905 (33.5)                                                   | 95 (31.6)                                                            | 80 (36.2)                                                        |
| Liver disease                     | 875 (27.1)                   | 718 (26.6)                                                   | 93 (30.9)                                                            | 64 (29.0)                                                        |
| Chronic pulmonary disease         | 841 (26.1)                   | 675 (25.0)                                                   | 97 (32.2)                                                            | 69 (31.2)                                                        |
| Psychosis                         | 830 (25.7)                   | 680 (25.2)                                                   | 67 (22.3)                                                            | 83 (37.6)                                                        |
| Non-alcoholic fatty liver disease | 825 (25.6)                   | 681 (25.2)                                                   | 87 (28.9)                                                            | 57 (25.8)                                                        |
| Acquired hypothyroidism           | 635 (19.7)                   | 519 (19.2)                                                   | 68 (22.6)                                                            | 48 (21.7)                                                        |
| Complicated diabetes              | 494 (15.3)                   | 389 (14.4)                                                   | 43 (14.3)                                                            | 62 (28.1)                                                        |
| Deficiency anemia                 | 472 (14.6)                   | 400 (14.8)                                                   | 40 (13.3)                                                            | 32 (14.5)                                                        |
| Cardiac arrhythmias               | 464 (14.4)                   | 383 (14.2)                                                   | 40 (13.3)                                                            | 41 (18.6)                                                        |
| Eating disorder                   | 373 (11.6)                   | 316 (11.7)                                                   | 36 (12.0)                                                            | 21 (9.5)                                                         |
| Congestive heart failure          | 302 (9.4)                    | 250 (9.3)                                                    | 24 (8.0)                                                             | 28 (12.7)                                                        |
| Osteoarthritis, lower limb        | 298 (9.2)                    | 242 (9.0)                                                    | 26 (8.6)                                                             | 30 (13.6)                                                        |
| Fluid and electrolyte disorders   | 288 (8.9)                    | 239 (8.8)                                                    | 26 (8.6)                                                             | 23 (10.4)                                                        |
| Kidney diseases                   | 242 (7.5)                    | 203 (7.5)                                                    | 17 (5.7)                                                             | 22 (10.0)                                                        |
| Substance use disorder            | 185 (5.7)                    | >153 (>5.7)                                                  | <11 (<3.7)                                                           | 21 (9.5)                                                         |
| Psychotic disorder                | 182 (5.6)                    | 158 (>5.8)                                                   | 13 (4.3)                                                             | <11 (<5.0)                                                       |
| Renal failure                     | 171 (5.3)                    | >143 (>5.3)                                                  | <11 (<3.7)                                                           | 17 (7.7)                                                         |
| Peripheral vascular disease       | 160 (5.0)                    | 136 (5.0)                                                    | 11 (3.7)                                                             | 13 (5.9)                                                         |
| Polycystic ovarian syndrome       | 148 (4.6)                    | >126 (>4.7)                                                  | <11 (<3.7)                                                           | <11 (<5.0)                                                       |
| Smoker                            | 134 (4.2)                    | 119 (4.4)                                                    | 15 (5.0)                                                             | 0 (0.0)                                                          |
| Any tumor                         | 131 (4.1)                    | >104 (>3.8)                                                  | <11 (<3.7)                                                           | 16 (7.2)                                                         |
| Weight loss                       | 110 (3.4)                    | >88 (>3.3)                                                   | 11 (3.7)                                                             | <11 (<5.0)                                                       |
| Pulmonary circulation disorders   | 89 (2.8)                     | >64 (>2.4)                                                   | <11 (<3.7)                                                           | 14 (6.3)                                                         |
| Coagulopathy                      | 78 (2.4)                     | >56 (>2.1)                                                   | <11 (<3.7)                                                           | <11 (<5.0)                                                       |
| Deep vein thrombosis              | 55 (1.7)                     | >33 (>1.2)                                                   | <11 (<3.7)                                                           | <11 (<5.0)                                                       |
| Pulmonary embolism                | 46 (1.4)                     | >24 (>0.9)                                                   | <11 (<3.7)                                                           | <11 (<5.0)                                                       |
| Alcohol abuse                     | 35 (1.1)                     | >24 (>0.9)                                                   | <11 (<3.7)                                                           | 0 (0.0)                                                          |

<sup>a</sup>Cells with <11 patients have been masked to maintain the deidentification nature of the database.
